# Supplementary material for: The Reuse of Municipal Solid Waste Fly Ash as Flame Retardant Filler: A Preliminary Study
Source: MDPI journal article supplement (doi:10.3390/su14042038), 2022-02-11
Supplement: s1 [file s1]

Table S1: Vertical Burning test (UL94-V) of composites 1 (100% epoxy resin – 0% stabilized fly ash)

|   | Afterflame<br>[t <sub>1</sub> ] | Afterflame<br>[t <sub>2</sub> ] | Afterglow<br>[t <sub>3</sub> ] | t <sub>1</sub> +t <sub>2</sub> | t <sub>2</sub> +t <sub>3</sub> | Combustion<br>of sample | Ignition of<br>cotton | UL94<br>class |
|---|---------------------------------|---------------------------------|--------------------------------|--------------------------------|--------------------------------|-------------------------|-----------------------|---------------|
| 1 | N.D.*                           | N.D.                            | N.D.                           | N.D.                           | N.D.                           | Yes                     | Yes                   | –             |
| 2 | N.D.                            | N.D.                            | N.D.                           | N.D.                           | N.D.                           | Yes                     | Yes                   |               |
| 3 | N.D.                            | N.D.                            | N.D.                           | N.D.                           | N.D.                           | Yes                     | Yes                   |               |
| 4 | N.D.                            | N.D.                            | N.D.                           | N.D.                           | N.D.                           | Yes                     | Yes                   |               |
| 5 | N.D.                            | N.D.                            | N.D.                           | N.D.                           | N.D.                           | Yes                     | Yes                   |               |

\*Not determined

Table S2: Vertical Burning test (UL94-V) of composites 2 (90% epoxy resin – 10% stabilized fly ash)

|   | Afterflame<br>[t <sub>1</sub> ] | Afterflame<br>[t <sub>2</sub> ] | Afterglow<br>[t <sub>3</sub> ] | t <sub>1</sub> +t <sub>2</sub> | t <sub>2</sub> +t <sub>3</sub> | Combustion<br>of sample | Ignition of<br>cotton | UL94<br>class |
|---|---------------------------------|---------------------------------|--------------------------------|--------------------------------|--------------------------------|-------------------------|-----------------------|---------------|
| 1 | N.D.*                           | N.D.                            | N.D.                           | N.D.                           | N.D.                           | Yes                     | Yes                   | –             |
| 2 | N.D.                            | N.D.                            | N.D.                           | N.D.                           | N.D.                           | Yes                     | Yes                   |               |
| 3 | N.D.                            | N.D.                            | N.D.                           | N.D.                           | N.D.                           | Yes                     | Yes                   |               |
| 4 | N.D.                            | N.D.                            | N.D.                           | N.D.                           | N.D.                           | Yes                     | Yes                   |               |
| 5 | N.D.                            | N.D.                            | N.D.                           | N.D.                           | N.D.                           | Yes                     | Yes                   |               |

\*Not determined

Table S3: Vertical Burning test (UL94-V) of composites 3 (70% epoxy resin – 30% stabilized fly ash)

|   | Afterflame<br>[t <sub>1</sub> ] | Afterflame<br>[t <sub>2</sub> ] | Afterglow<br>[t <sub>3</sub> ] | t <sub>1</sub> +t <sub>2</sub> | t <sub>2</sub> +t <sub>3</sub> | Combustion<br>of sample | Ignition of<br>cotton | UL94<br>class |
|---|---------------------------------|---------------------------------|--------------------------------|--------------------------------|--------------------------------|-------------------------|-----------------------|---------------|
| 1 | N.D.*                           | N.D.                            | N.D.                           | N.D.                           | N.D.                           | Yes                     | No                    | –             |
| 2 | N.D.                            | N.D.                            | N.D.                           | N.D.                           | N.D.                           | Yes                     | No                    |               |
| 3 | N.D.                            | N.D.                            | N.D.                           | N.D.                           | N.D.                           | Yes                     | No                    |               |
| 4 | N.D.                            | N.D.                            | N.D.                           | N.D.                           | N.D.                           | Yes                     | No                    |               |
| 5 | N.D.                            | N.D.                            | N.D.                           | N.D.                           | N.D.                           | Yes                     | No                    |               |

\*Not determined

Table S4: Vertical Burning test (UL94-V) of composites 4 (50% epoxy resin – 50% stabilized fly ash)

|   | Afterflame<br>[t <sub>1</sub> ] | Afterflame<br>[t <sub>2</sub> ] | Afterglow<br>[t <sub>3</sub> ] | t <sub>1</sub> +t <sub>2</sub> | t <sub>2</sub> +t <sub>3</sub> | Combustion<br>of sample | Ignition of<br>cotton | UL94<br>class |
|---|---------------------------------|---------------------------------|--------------------------------|--------------------------------|--------------------------------|-------------------------|-----------------------|---------------|
| 1 | N.D.*                           | N.D.                            | N.D.                           | N.D.                           | N.D.                           | Yes                     | No                    | –             |
| 2 | N.D.                            | N.D.                            | N.D.                           | N.D.                           | N.D.                           | Yes                     | No                    |               |
| 3 | N.D.                            | N.D.                            | N.D.                           | N.D.                           | N.D.                           | Yes                     | No                    |               |
| 4 | N.D.                            | N.D.                            | N.D.                           | N.D.                           | N.D.                           | Yes                     | No                    |               |
| 5 | N.D.                            | N.D.                            | N.D.                           | N.D.                           | N.D.                           | Yes                     | No                    |               |

\*Not determined

Table S5: Vertical Burning test (UL94-V) of composites 5 (30% epoxy resin – 70% stabilized fly ash)

|   | Afterflame<br>[t <sub>1</sub> ] | Afterflame<br>[t <sub>2</sub> ] | Afterglow<br>[t <sub>3</sub> ] | t <sub>1</sub> +t <sub>2</sub> | t <sub>2</sub> +t <sub>3</sub> | Combustion<br>of sample   | Ignition of<br>cotton | UL94 class |
|---|---------------------------------|---------------------------------|--------------------------------|--------------------------------|--------------------------------|---------------------------|-----------------------|------------|
| 1 | <2 s                            | N.D.*                           | N.D.                           | N.D.                           | N.D.                           | Yes, after t <sub>1</sub> | NO                    | –          |
| 2 | 4 s                             | N.D.                            | N.D.                           | N.D.                           | N.D.                           | Yes, after t <sub>1</sub> | NO                    |            |
| 3 | < 2 s                           | < 2 s                           | -                              | < 4 s                          | -                              | NO                        | NO                    |            |

\*Not determined

Table S6: Vertical Burning test (UL94-V) of composites 6 (90% epoxy resin – 10% CaCO<sub>3</sub>)

|   | Afterflame<br>[t <sub>1</sub> ] | Afterflame<br>[t <sub>2</sub> ] | Afterglow<br>[t <sub>3</sub> ] | t <sub>1</sub> +t <sub>2</sub> | t <sub>2</sub> +t <sub>3</sub> | Combustion<br>of sample | Ignition of<br>cotton | UL94<br>class |
|---|---------------------------------|---------------------------------|--------------------------------|--------------------------------|--------------------------------|-------------------------|-----------------------|---------------|
| 1 | N.D.*                           | N.D.                            | N.D.                           | N.D.                           | N.D.                           | Yes                     | Yes                   | –             |
| 2 | N.D.                            | N.D.                            | N.D.                           | N.D.                           | N.D.                           | Yes                     | Yes                   |               |
| 3 | N.D.                            | N.D.                            | N.D.                           | N.D.                           | N.D.                           | Yes                     | Yes                   |               |
| 4 | N.D.                            | N.D.                            | N.D.                           | N.D.                           | N.D.                           | Yes                     | Yes                   |               |
| 5 | N.D.                            | N.D.                            | N.D.                           | N.D.                           | N.D.                           | Yes                     | Yes                   |               |

\*Not determined

Table S7: Vertical Burning test (UL94-V) of composites 7 (70% epoxy resin – 30% CaCO<sub>3</sub>)

|   | Afterflame<br>[t <sub>1</sub> ] | Afterflame<br>[t <sub>2</sub> ] | Afterglow<br>[t <sub>3</sub> ] | t <sub>1</sub> +t <sub>2</sub> | t <sub>2</sub> +t <sub>3</sub> | Combustion<br>of sample | Ignition of<br>cotton | UL94<br>class |
|---|---------------------------------|---------------------------------|--------------------------------|--------------------------------|--------------------------------|-------------------------|-----------------------|---------------|
| 1 | N.D.*                           | N.D.                            | N.D.                           | N.D.                           | N.D.                           | Yes                     | No                    | –             |
| 2 | N.D.                            | N.D.                            | N.D.                           | N.D.                           | N.D.                           | Yes                     | No                    |               |
| 3 | N.D.                            | N.D.                            | N.D.                           | N.D.                           | N.D.                           | Yes                     | No                    |               |
| 4 | N.D.                            | N.D.                            | N.D.                           | N.D.                           | N.D.                           | Yes                     | No                    |               |
| 5 | N.D.                            | N.D.                            | N.D.                           | N.D.                           | N.D.                           | Yes                     | No                    |               |

\*Not determined

Table S8: Vertical Burning test (UL94-V) of composites 8 (50% epoxy resin – 50% CaCO<sub>3</sub>)

|   | Afterflame<br>[t <sub>1</sub> ] | Afterflame<br>[t <sub>2</sub> ] | Afterglow<br>[t <sub>3</sub> ] | t <sub>1</sub> +t <sub>2</sub> | t <sub>2</sub> +t <sub>3</sub> | Combustion<br>of sample | Ignition of<br>cotton | UL94<br>class |
|---|---------------------------------|---------------------------------|--------------------------------|--------------------------------|--------------------------------|-------------------------|-----------------------|---------------|
| 1 | N.D.*                           | N.D.                            | N.D.                           | N.D.                           | N.D.                           | Yes                     | No                    | –             |
| 2 | N.D.                            | N.D.                            | N.D.                           | N.D.                           | N.D.                           | Yes                     | No                    |               |
| 3 | N.D.                            | N.D.                            | N.D.                           | N.D.                           | N.D.                           | Yes                     | No                    |               |
| 4 | N.D.                            | N.D.                            | N.D.                           | N.D.                           | N.D.                           | Yes                     | No                    |               |
| 5 | N.D.                            | N.D.                            | N.D.                           | N.D.                           | N.D.                           | Yes                     | No                    |               |

\*Not determined

Table S9: Vertical Burning test (UL94-V) of composites 9 (30% epoxy resin – 70% CaCO<sub>3</sub>)

|   | Afterflame<br>[t <sub>1</sub> ] | Afterflame<br>[t <sub>2</sub> ] | Afterglow<br>[t <sub>3</sub> ] | t <sub>1</sub> +t <sub>2</sub> | t <sub>2</sub> +t <sub>3</sub> | Combustion<br>of sample   | Ignition of<br>cotton | UL94<br>class |
|---|---------------------------------|---------------------------------|--------------------------------|--------------------------------|--------------------------------|---------------------------|-----------------------|---------------|
| 1 | <2s                             | N.D.                            | N.D.                           | N.D.                           | N.D.                           | Yes, after t <sub>1</sub> | No                    | —             |
| 2 | N.D.*                           | N.D.                            | N.D.                           | N.D.                           | N.D.                           | Yes                       | No                    |               |
| 3 | <2s                             | N.D.                            | N.D.                           | N.D.                           | N.D.                           | Yes, after t <sub>1</sub> | No                    |               |
| 4 | N.D.                            | N.D.                            | N.D.                           | N.D.                           | N.D.                           | Yes                       | No                    |               |
| 5 | N.D.                            | N.D.                            | N.D.                           | N.D.                           | N.D.                           | Yes                       | No                    |               |

\*Not determined
